# Supplementary material for: Prompt Engineering in Large Language Models for BI-RADS Classification of Imaging Reports: A Retrospective Evaluation
Source: Research Square preprint supplement (doi:10.21203/rs.3.rs-7526460/v1), 2025-10-19
Supplement: Supplementary file 1 [file 897773e2305592be9d217842.docx]

**Table S1**. Standardized prompts.

|  | Prompt content |
| --- | --- |
| Prompt Ⅰ | As an imaging expert with specialized proficiency in BI-RADS categorization, please systematically analyze the provided imaging descriptions and assign a BI-RADS category to the most significant abnormality identified within the breast parenchyma, focusing exclusively on classifications 2, 3, 4, or 5 without subclassification for Category 4. Your assessment should prioritize the most prominent abnormality in the breast tissue, and in cases where no abnormalities are detected, a bilateral breast evaluation should be provided. Throughout the analysis, maintain strict adherence to standardized BI-RADS terminology and diagnostic criteria to ensure consistency and clinical relevance. |
| Prompt Ⅱ | As an imaging expert with specialized proficiency in BI-RADS categorization, please systematically analyze the provided imaging descriptions and assign a BI-RADS category to the most significant abnormality identified within the breast parenchyma, focusing exclusively on classifications 2, 3, 4, or 5 without subclassification for Category 4. Your assessment should prioritize the most prominent abnormality in the breast tissue, and in cases where no abnormalities are detected, a bilateral breast evaluation should be provided. Throughout the analysis, maintain strict adherence to standardized BI-RADS terminology and diagnostic criteria to ensure consistency and clinical relevance.  **Note:In cases where diagnostic ambiguity or classification challenges arise, you are authorized to escalate the BI-RADS category to a higher level following careful deliberation and clinical judgment to ensure optimal patient management.** |
| Prompt Ⅲ | As an imaging expert with specialized proficiency in BI-RADS categorization, please systematically analyze the provided imaging descriptions and assign a BI-RADS category to the most significant abnormality identified within the breast parenchyma, focusing exclusively on classifications 2, 3, 4, or 5 without subclassification for Category 4. Your assessment should prioritize the most prominent abnormality in the breast tissue, and in cases where no abnormalities are detected, a bilateral breast evaluation should be provided. Throughout the analysis, maintain strict adherence to standardized BI-RADS terminology and diagnostic criteria to ensure consistency and clinical relevance.  **Note:1. In cases where diagnostic ambiguity or classification challenges arise, you are authorized to escalate the BI-RADS category to a higher level following careful deliberation and clinical judgment to ensure optimal patient management.**  **2. Even for benign findings (e.g., calcifications, small nodules), it is imperative to thoroughly analyze the imaging results, assign the appropriate BI-RADS category, and critically evaluate whether upgrading the category is warranted to avoid underestimation of potential risks.** |

BI-RADS, Breast Imaging Reporting and Data System.

**Table S2.** Repeatability of assignments by large language models.

|  | Prompt I  (40 reports) | Prompt II  (40 reports) | Prompt III  (40 reports) |
| --- | --- | --- | --- |
| GPT-4o | 0.83 (0.72, 0.94) | 0.83 (0.73, 0.93) | 0.84 (0.74, 0.95) |
| GPT-o3 mini | 0.68 (0.52, 0.85) | 0.84 (0.73, 0.96) | 0.85 (0.75, 0.96) |
| Qwen-2.5 max | 0.78 (0.67, 0.89) | 0.74 (0.63, 0.86) | 0.90 (0.81, 0.98) |

Except where indicated, data are Cohen's Weighted kappa, with 95% CIs in parentheses.

**Table S3.** Agreement between LLMs in Prompt II and the reference standard on clinical management reports.

| Outcome | Standard-GPT-4o | Standard-GPT-o3 | Standard-Qwen |
| --- | --- | --- | --- |
| Weighted Cohen’s kappa (95% CI) | 0.69 (0.63, 0.75) | 0.74 (0.68, 0.79) | 0.68 (0.62, 0.74) |
| No change in management | 61/216 (28.2%) | 49/216 (22.7%) | 63/216 (29.2%) |
| Upgraded | 1/216 (0.5%) | 10/126 (7.9%) | 2/216 (0.9%) |
| From BI-RADS 2 to BI-RADS 3 | 1/1 (100%) | 6/10 (60.0%) | 2/2 (100%) |
| From BI-RADS 2/3 to BI-RADS 4/5 | 0/1 (0%) | 4/10 (40.0%) | 0/2 (0%) |
| Downgraded | 60/216 (27.8%) | 39/216 (18.1%) | 61/216 (28.2%) |
| From BI-RADS 3 to BI-RADS 2 | 48/60 (80.0%) | 26/39 (66.7%) | 43/61 (70.5%) |
| From BI-RADS 4/5 to BI-RADS 2 | 10/60 (16.7%) | 1/39 (2.6%) | 12/61 (19.7%) |
| From BI-RADS 4/5 to BI-RADS 3 | 2/60 (3.3%) | 12/39 (30.8%) | 6/61 (9.8%) |

Data are expressed as a numerator and a denominator with the percentage in parentheses.

LLM= large language model. GPT-o3= GPT-o3 mini. Qwen= Qwen-2.5 max. CIs= confidence intervals.

BI-RADS= Breast Imaging Reporting and Data System.
